# Supplementary material
Source: Research Square preprint supplement (doi:10.21203/rs.3.rs-9682319/v1)
Supplement: Supplementary file 1 [file 090568948ce92e5b9bf28392.docx]

**Supplementary Information**


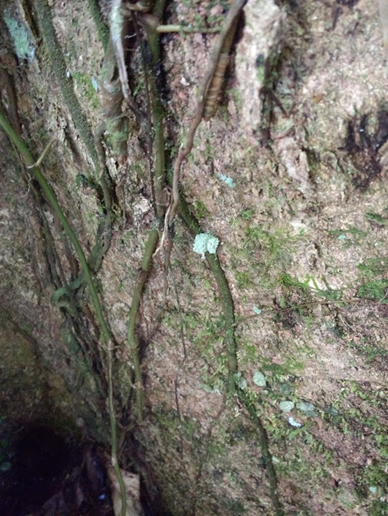

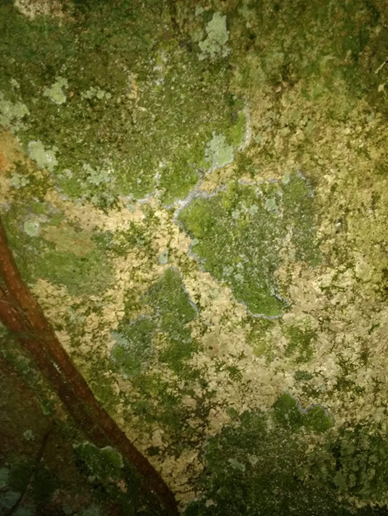


b

a

Figure S1 Photographs of tree bark from the dry and rainy season: (a) from 14 May, shows a green lacewing larva, circled in red, with a largely white cargo; (b) from 24 July, shows increased algal and other growth on the tree bark. The two photographs are located on different *Licania platypus* trees but are representative of changes seen on tree bark during that time period.
